# Supplementary material for: Structural Differences Between Healthy Subjects and Patients With Schizophrenia or Schizoaffective Disorder: A Graph and Control Theoretical Perspective
Source: PubMed Central journal article supplement (PMC8273511; doi:10.3389/fpsyt.2021.669783), 2021-06-28
Supplement: Data_Sheet_1.pdf [file Data_Sheet_1.pdf]

## Supplementary Material

### 1 SUPPLEMENTARY TABLES AND FIGURES

#### 1.1 Tables

**Table S1.** Permutation test statistics for a comparison of the top 15 regions with highest average and modal controllability per group (SCZ and SCZaff), respectively, against the HC group.

|                                  | Hedge's $g$ | 95% CI interval | permutation p-value |
|----------------------------------|-------------|-----------------|---------------------|
| Average controllability (SCZ)    | -0.302      | [-1.030, 0.455] | $p = 0.4$           |
| Modal controllability (SCZ)      | 0.111       | [-0.580, 0.858] | $p = 0.741$         |
| Average controllability (SCZaff) | -0.054      | [-0.824, 0.677] | $p = 0.877$         |
| Modal controllability (SCZaff)   | 0.21        | [-0.487, 0.922] | $p = 0.555$         |

**Table S2.** Permutation test statistics for the pooled SCZ and SCZaff group (sample size  $n = 52$ ). Comparison against the HC group (sample size  $n = 43$ ).

|                            | Hedge's $g$ | 95% CI interval  | permutation p-value<br>(uncorrected) |
|----------------------------|-------------|------------------|--------------------------------------|
| Characteristic path length | 0.447       | [0.030, 0.866]   | $p = 0.034$                          |
| Cluster coefficient        | -0.422      | [-0.739, -0.038] | $p = 0.032$                          |
| Betweenness centrality     | -0.712      | [-1.130, -0.294] | $p = 0.001$                          |
| Closeness centrality       | -0.429      | [-0.852, -0.015] | $p = 0.040$                          |
| Transitivity               | -0.368      | [-0.787, 0.034]  | $p = 0.082$                          |
| Global efficiency          | -0.424      | [-0.857, -0.009] | $p = 0.043$                          |
| Assortativity              | -0.155      | [-0.550, 0.262]  | $p = 0.448$                          |

**Table S3.** Permutation test statistics for the pooled SCZ and SCZaff group (sample size  $n = 52$ ). Comparison against the HC group (sample size  $n = 43$ ).

|                         | Hedge's $g$ | 95% CI           | permutation p-value<br>(uncorr.) |
|-------------------------|-------------|------------------|----------------------------------|
| Average controllability | -0.606      | [-1.040, -0.171] | $p = 0.006$                      |
| Modal controllability   | 0.476       | [0.047, 0.897]   | $p = 0.028$                      |

**Table S4.** Correlation of medication (CPZ equivalent dose) with the graph and controllability measures for the SCZ group (sample size  $n = 43$ ).

|                            | Correlation coefficient | p-value     |
|----------------------------|-------------------------|-------------|
| Characteristic path length | 0.124                   | $p = 0.428$ |
| Cluster coefficient        | -0.106                  | $p = 0.499$ |
| Betweenness centrality     | 0.021                   | $p = 0.893$ |
| Closeness centrality       | -0.012                  | $p = 0.939$ |
| Transitivity               | 0.077                   | $p = 0.624$ |
| Global efficiency          | -0.018                  | $p = 0.909$ |
| Assortativity              | -0.017                  | $p = 0.914$ |
| Average Controllability    | -0.191                  | $p = 0.220$ |
| Modal Controllability      | 0.183                   | $p = 0.240$ |

**Table S5.** Correlation of medication (CPZ equivalent dose) with the graph and controllability measures for the SCZaff group (sample size  $n = 9$ ).

|                            | Correlation coefficient | p-value     |
|----------------------------|-------------------------|-------------|
| Characteristic path length | -0.539                  | $p = 0.134$ |
| Cluster coefficient        | 0.044                   | $p = 0.911$ |
| Betweenness centrality     | 0.263                   | $p = 0.494$ |
| Closeness centrality       | 0.461                   | $p = 0.212$ |
| Transitivity               | -0.375                  | $p = 0.320$ |
| Global efficiency          | 0.462                   | $p = 0.211$ |
| Assortativity              | -0.002                  | $p = 0.996$ |
| Average Controllability    | 0.309                   | $p = 0.418$ |
| Modal Controllability      | -0.239                  | $p = 0.536$ |

**Table S6.** Assignment of AAL2 regions to one of 8 cognitive systems: Somatomotor, Default Mode (DMN), Control, Visual, Dorsal Attention, Ventral Attention, Limbic, and Other.

| Region               | Cognitive System     |
|----------------------|----------------------|
| Precentral_L         | Somatomotor          |
| Precentral_R         | Somatomotor          |
| Frontal_Sup_2_L      | Default Mode Network |
| Frontal_Sup_2_R      | Default Mode Network |
| Frontal_Mid_2_L      | Control              |
| Frontal_Mid_2_R      | Control              |
| Frontal_Inf_Oper_L   | Ventral Attention    |
| Frontal_Inf_Oper_R   | Control              |
| Frontal_Inf_Tri_L    | Control              |
| Frontal_Inf_Tri_R    | Control              |
| Frontal_Inf_Orb_2_L  | Default Mode Network |
| Frontal_Inf_Orb_2_R  | Default Mode Network |
| Rolandic_Oper_L      | Somatomotor          |
| Rolandic_Oper_R      | Somatomotor          |
| Supp_Motor_Area_L    | Somatomotor          |
| Supp_Motor_Area_R    | Somatomotor          |
| Olfactory_L          | Limbic               |
| Olfactory_R          | Limbic               |
| Frontal_Sup_Medial_L | Default Mode Network |
| Frontal_Sup_Medial_R | Default Mode Network |
| Frontal_Med_Orb_L    | Default Mode Network |
| Frontal_Med_Orb_R    | Default Mode Network |
| Rectus_L             | Limbic               |
| Rectus_R             | Limbic               |
| OFCmed_L             | Limbic               |
| OFCmed_R             | Limbic               |
| OFCant_L             | Limbic               |
| OFCant_R             | Control              |
| OFCpost_L            | Limbic               |
| OFCpost_R            | Limbic               |
| OFClat_L             | Default Mode Network |
| OFClat_R             | Default Mode Network |
| Insula_L             | Ventral Attention    |
| Insula_R             | Ventral Attention    |
| Cingulate_Ant_L      | Default Mode Network |
| Cingulate_Ant_R      | Default Mode Network |
| Cingulate_Mid_L      | Ventral Attention    |
| Cingulate_Mid_R      | Ventral Attention    |
| Cingulate_Post_L     | Default Mode Network |
| Cingulate_Post_R     | Default Mode Network |
| Hippocampus_L        | Other                |
| Hippocampus_R        | Limbic               |
| ParaHippocampal_L    | Limbic               |
| ParaHippocampal_R    | Limbic               |
| Amygdala_L           | Limbic               |
| Amygdala_R           | Other                |
| Calcarine_L          | Visual               |
| Calcarine_R          | Visual               |
| Cuneus_L             | Visual               |
| Cuneus_R             | Visual               |
| Lingual_L            | Visual               |
| Lingual_R            | Visual               |

**Table S7. Table S6, continued.** Assignment of AAL2 regions to one of cognitive systems continued: Somatomotor, Default Mode (DMN), Control, Visual, Dorsal Attention, Ventral Attention, Limbic, and Other.

| Region               | Cognitive System     |
|----------------------|----------------------|
| Occipital_Sup_L      | Visual               |
| Occipital_Sup_R      | Visual               |
| Occipital_Mid_L      | Visual               |
| Occipital_Mid_R      | Visual               |
| Occipital_Inf_L      | Visual               |
| Occipital_Inf_R      | Visual               |
| Fusiform_L           | Visual               |
| Fusiform_R           | Visual               |
| Postcentral_L        | Somatomotor          |
| Postcentral_R        | Somatomotor          |
| Parietal_Sup_L       | Dorsal Attention     |
| Parietal_Sup_R       | Dorsal Attention     |
| Parietal_Inf_L       | Dorsal Attention     |
| Parietal_Inf_R       | Control              |
| SupraMarginal_L      | Ventral Attention    |
| SupraMarginal_R      | Ventral Attention    |
| Angular_L            | Default Mode Network |
| Angular_R            | Default Mode Network |
| Precuneus_L          | Default Mode Network |
| Precuneus_R          | Dorsal Attention     |
| Paracentral_Lobule_L | Somatomotor          |
| Paracentral_Lobule_R | Somatomotor          |
| Caudate_L            | Limbic               |
| Caudate_R            | Other                |
| Putamen_L            | Other                |
| Putamen_R            | Ventral Attention    |
| Pallidum_L           | Other                |
| Pallidum_R           | Other                |
| Thalamus_L           | Other                |
| Thalamus_R           | Other                |
| Heschl_L             | Somatomotor          |
| Heschl_R             | Somatomotor          |
| Temporal_Sup_L       | Somatomotor          |
| Temporal_Sup_R       | Somatomotor          |
| Temporal_Pole_Sup_L  | Limbic               |
| Temporal_Pole_Sup_R  | Limbic               |
| Temporal_Mid_L       | Default Mode Network |
| Temporal_Mid_R       | Default Mode Network |
| Temporal_Pole_Mid_L  | Limbic               |
| Temporal_Pole_Mid_R  | Limbic               |
| Temporal_Inf_L       | Limbic               |
| Temporal_Inf_R       | Limbic               |

## 1.2 Figures

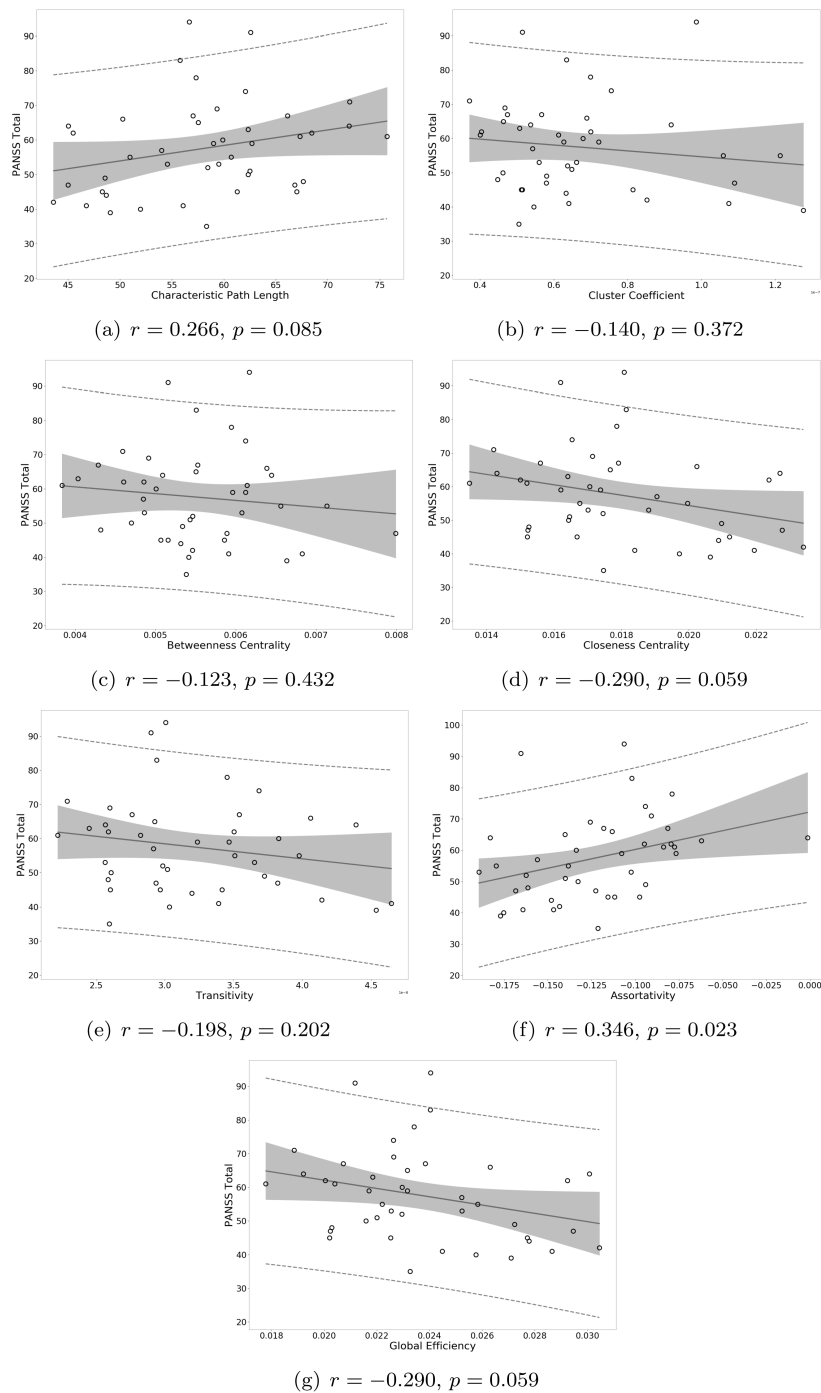

Figure S1: Correlation of graph measures of the SCZ group with PANSS total scores. a) characteristic path length, b) cluster coefficient, c) betweenness centrality, d) closeness centrality, e) transitivity, f) assortativity, and g) global efficiency. The line corresponds to the fitted trend line and the shaded region the 95% confidence interval.

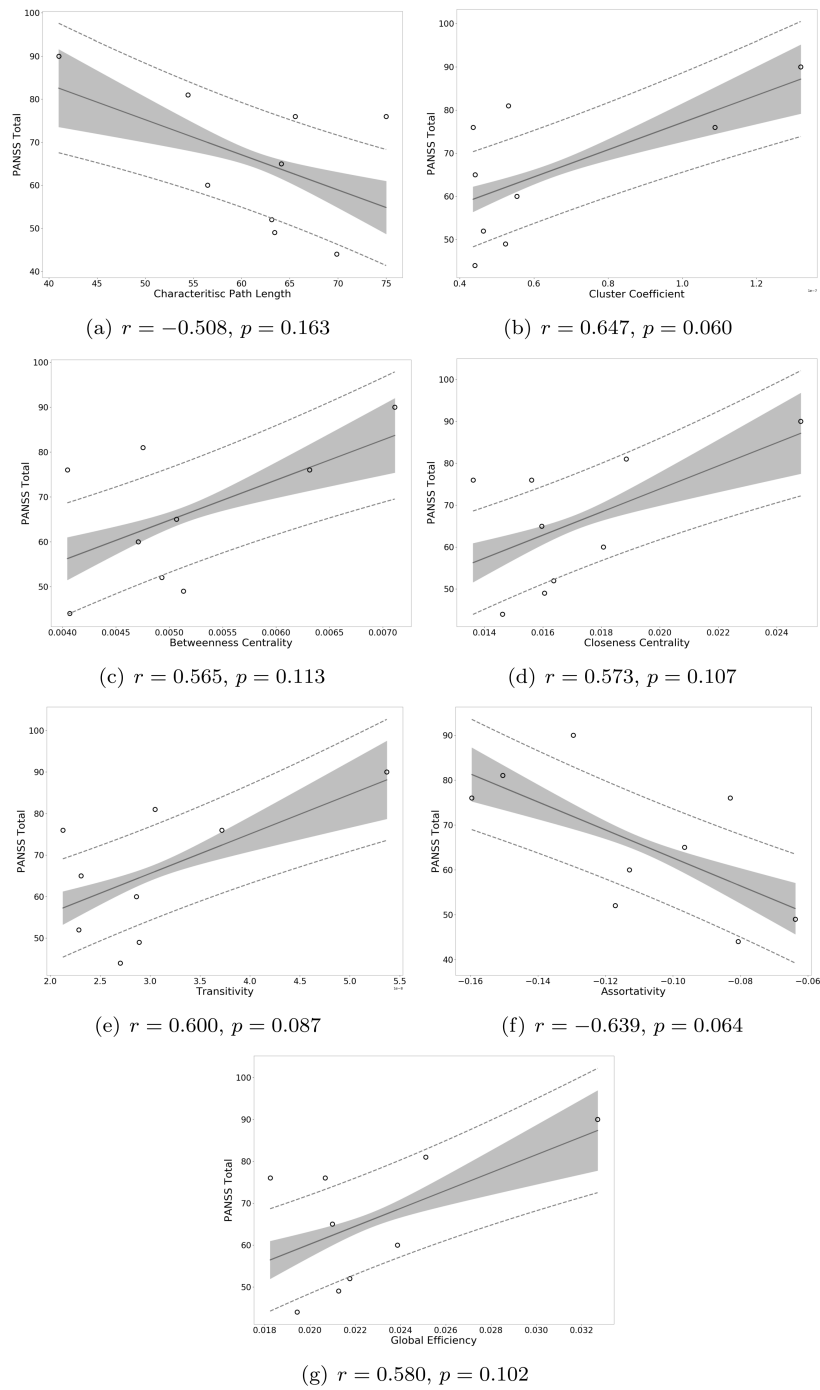

Figure S2: Correlation of graph measures of the SCZaff group with PANSS total scores. a) characteristic path length, b) cluster coefficient, c) betweenness centrality, d) closeness centrality, e) transitivity, f) assortativity, and g) global efficiency. The line corresponds to the fitted trend line and the shaded region the 95% confidence interval.

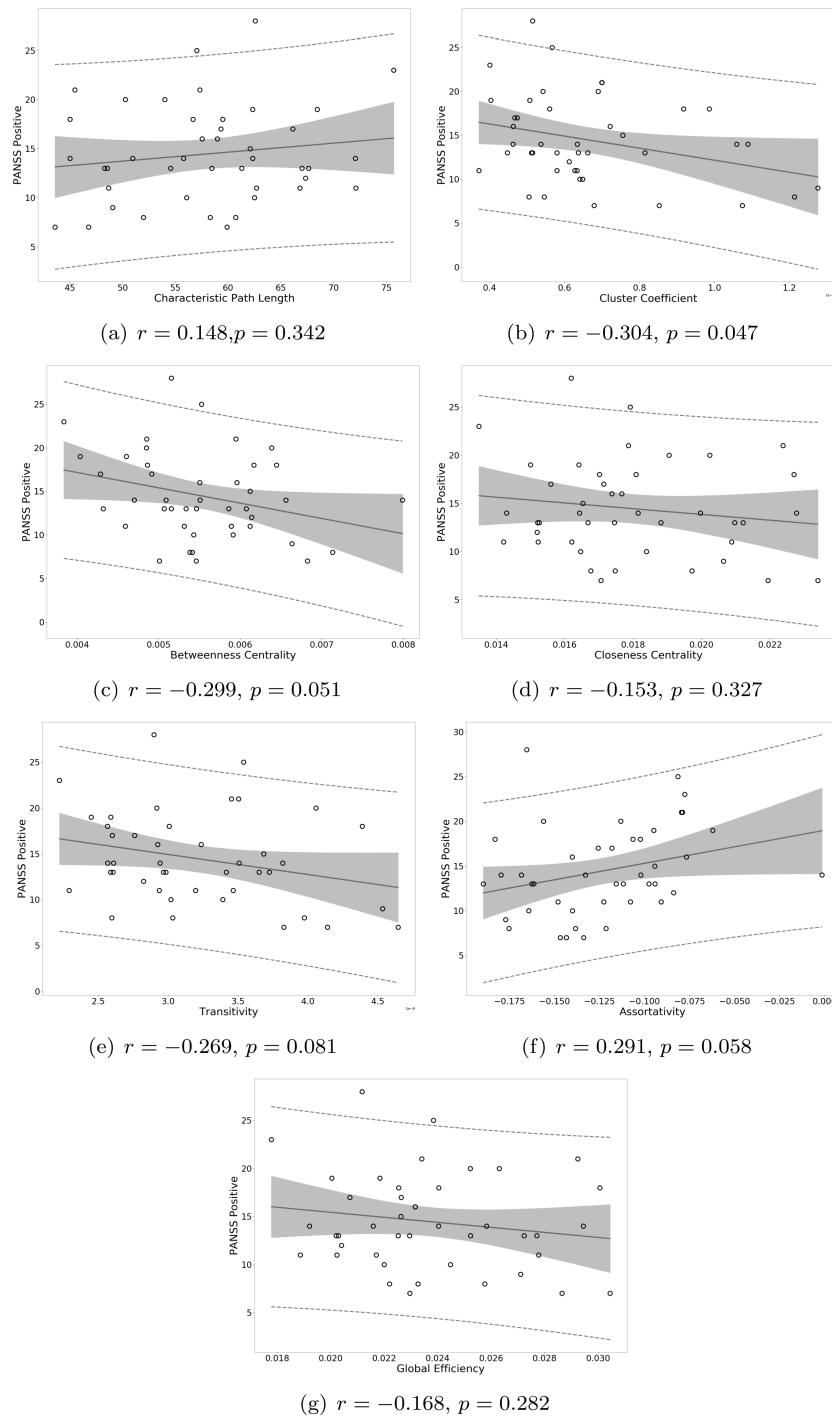

Figure S3: Correlation of graph measures of the SCZ group with PANSS positive scores. a) characteristic path length, b) cluster coefficient, c) betweenness centrality, d) closeness centrality, e) transitivity, f) assortativity, and g) global efficiency. The line corresponds to the fitted trend line and the shaded region the 95% confidence interval.

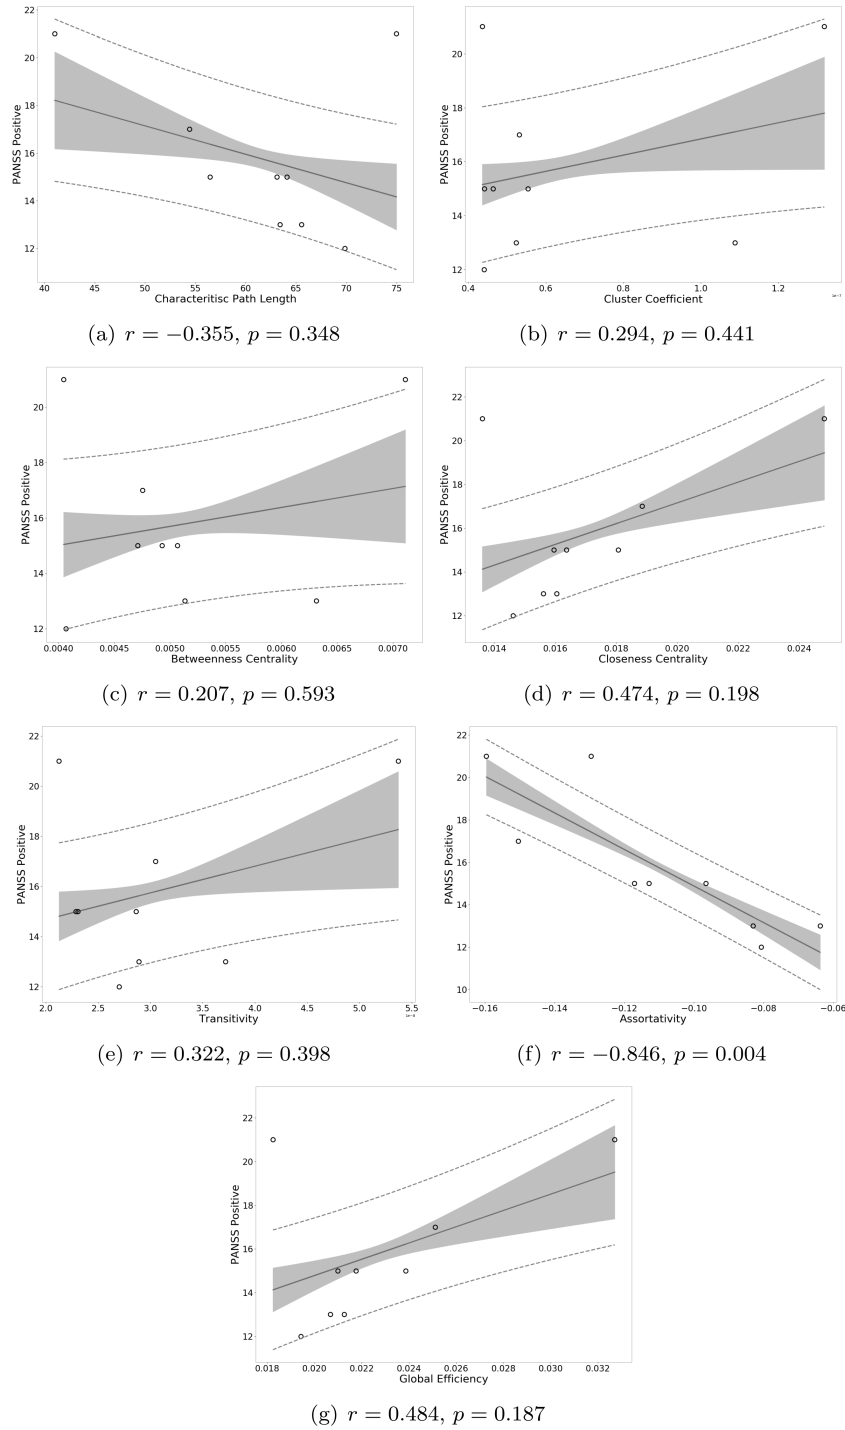

Figure S4: Correlation of graph measures of the SCZaff group with PANSS positive scores. a) characteristic path length, b) cluster coefficient, c) betweenness centrality, d) closeness centrality, e) transitivity, f) assortativity, and g) global efficiency. The line corresponds to the fitted trend line and the shaded region the 95% confidence interval.



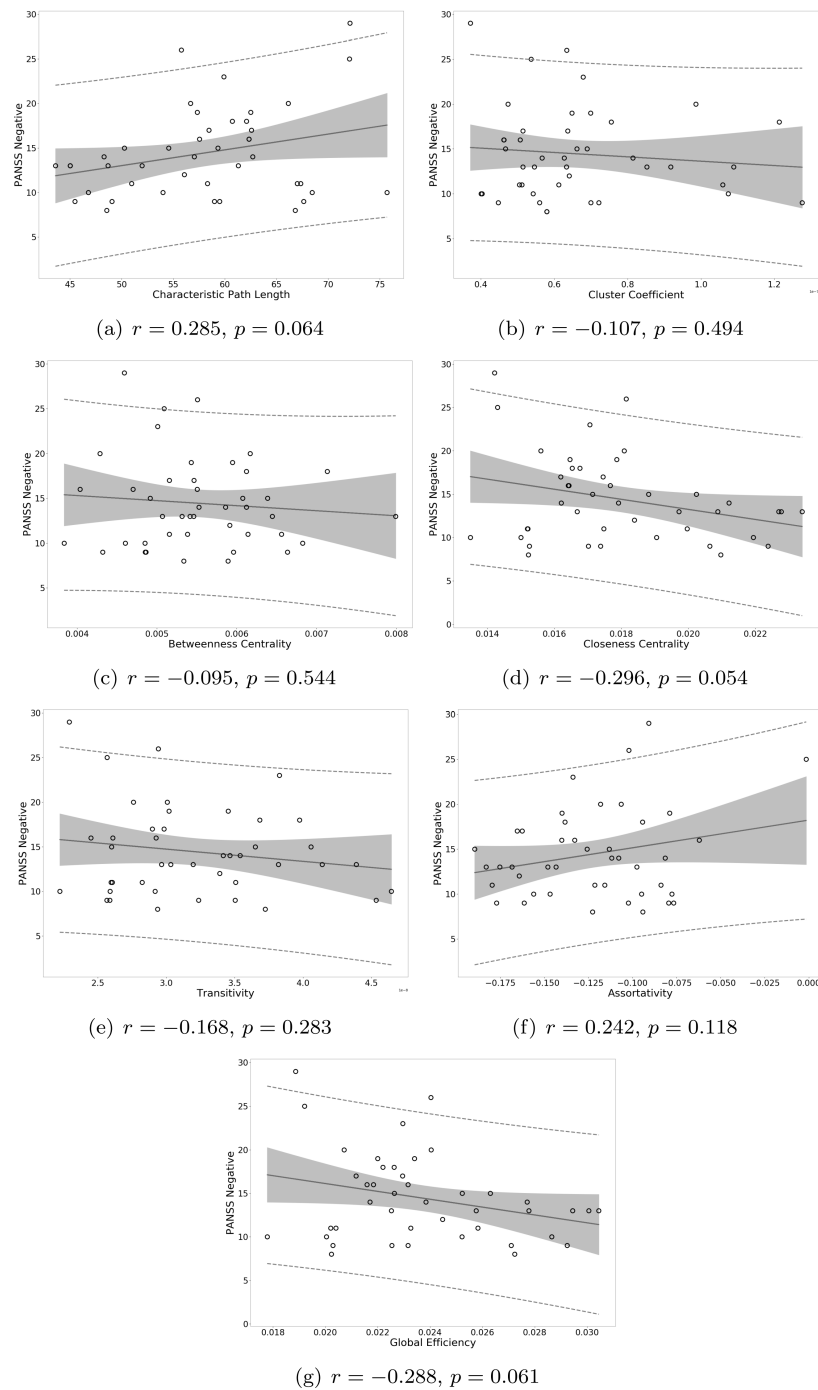

Figure S5: Correlation of graph measures of the SCZ group with PANSS negative scores. a) characteristic path length, b) cluster coefficient, c) betweenness centrality, d) closeness centrality, e) transitivity, f) assortativity, and g) global efficiency. The line corresponds to the fitted trend line and the shaded region the 95% confidence interval.

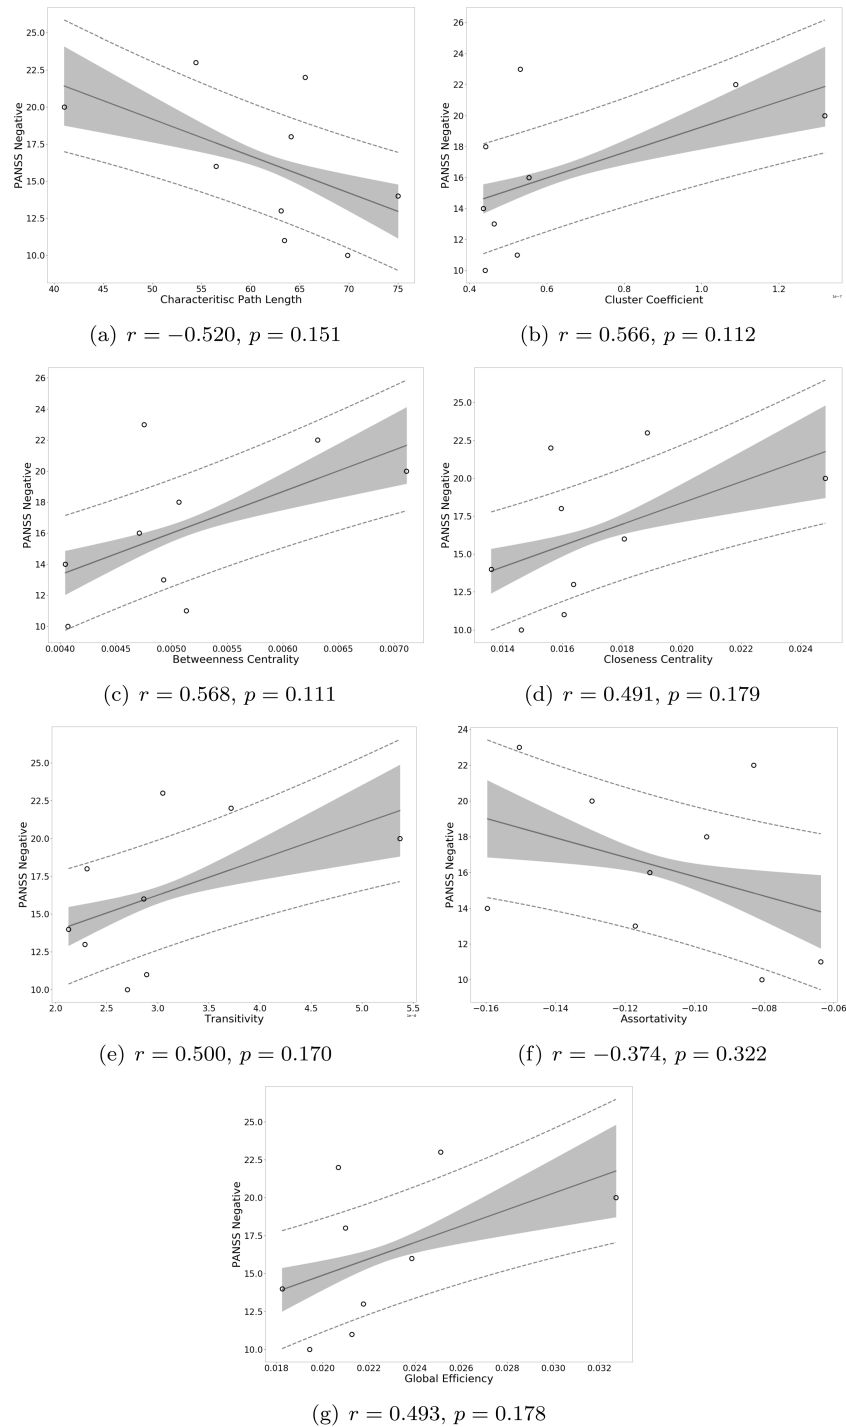

Figure S6: Correlation of graph measures of the SCZaff group with PANSS negative scores. a) characteristic path length, b) cluster coefficient, c) betweenness centrality, d) closeness centrality, e) transitivity, f) assortativity, and g) global efficiency. The line corresponds to the fitted trend line and the shaded region the 95% confidence interval.

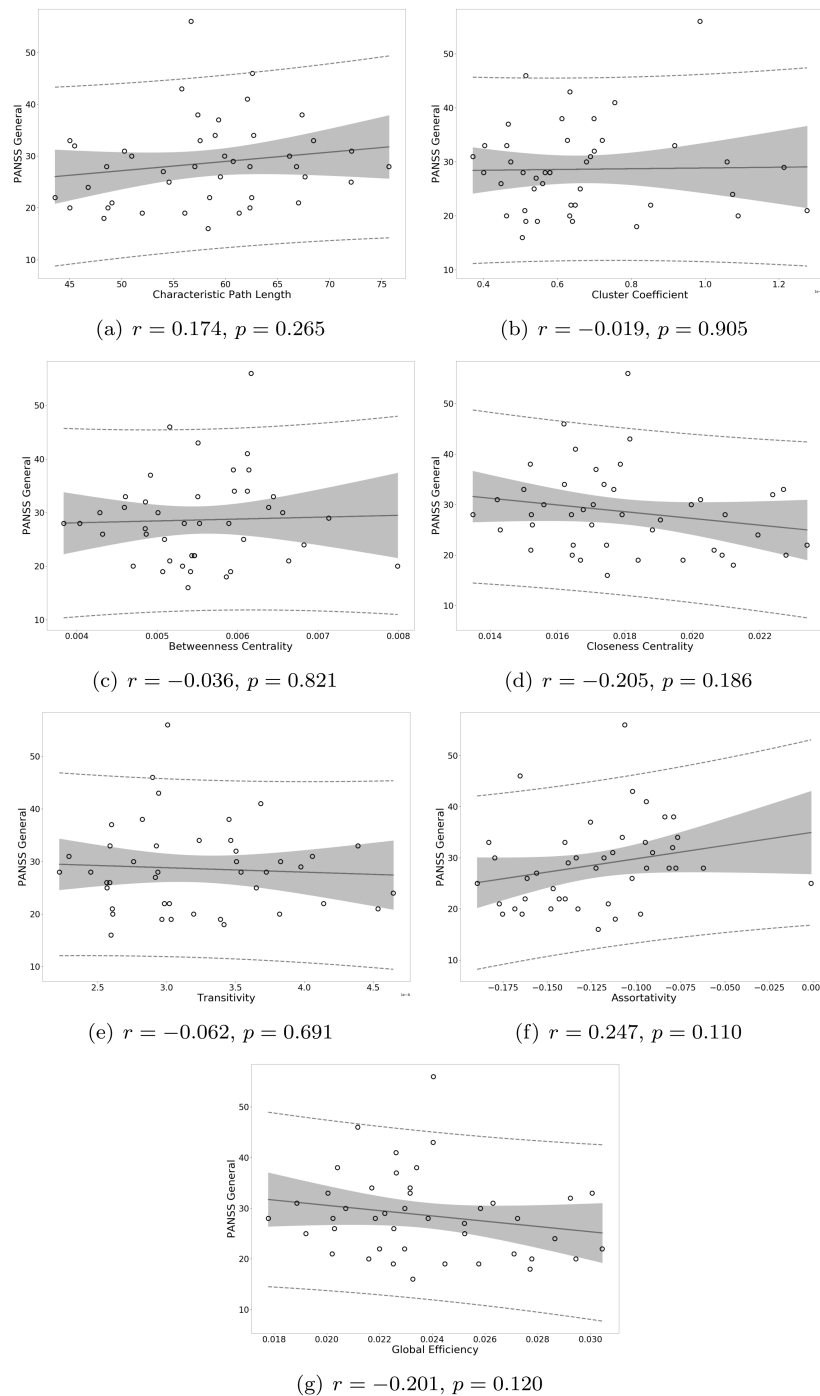

Figure S7: Correlation of graph measures of the SCZ group with PANSS general scores. a) characteristic path length, b) cluster coefficient, c) betweenness centrality, d) closeness centrality, e) transitivity, f) assortativity, and g) global efficiency. The line corresponds to the fitted trend line and the shaded region the 95% confidence interval.

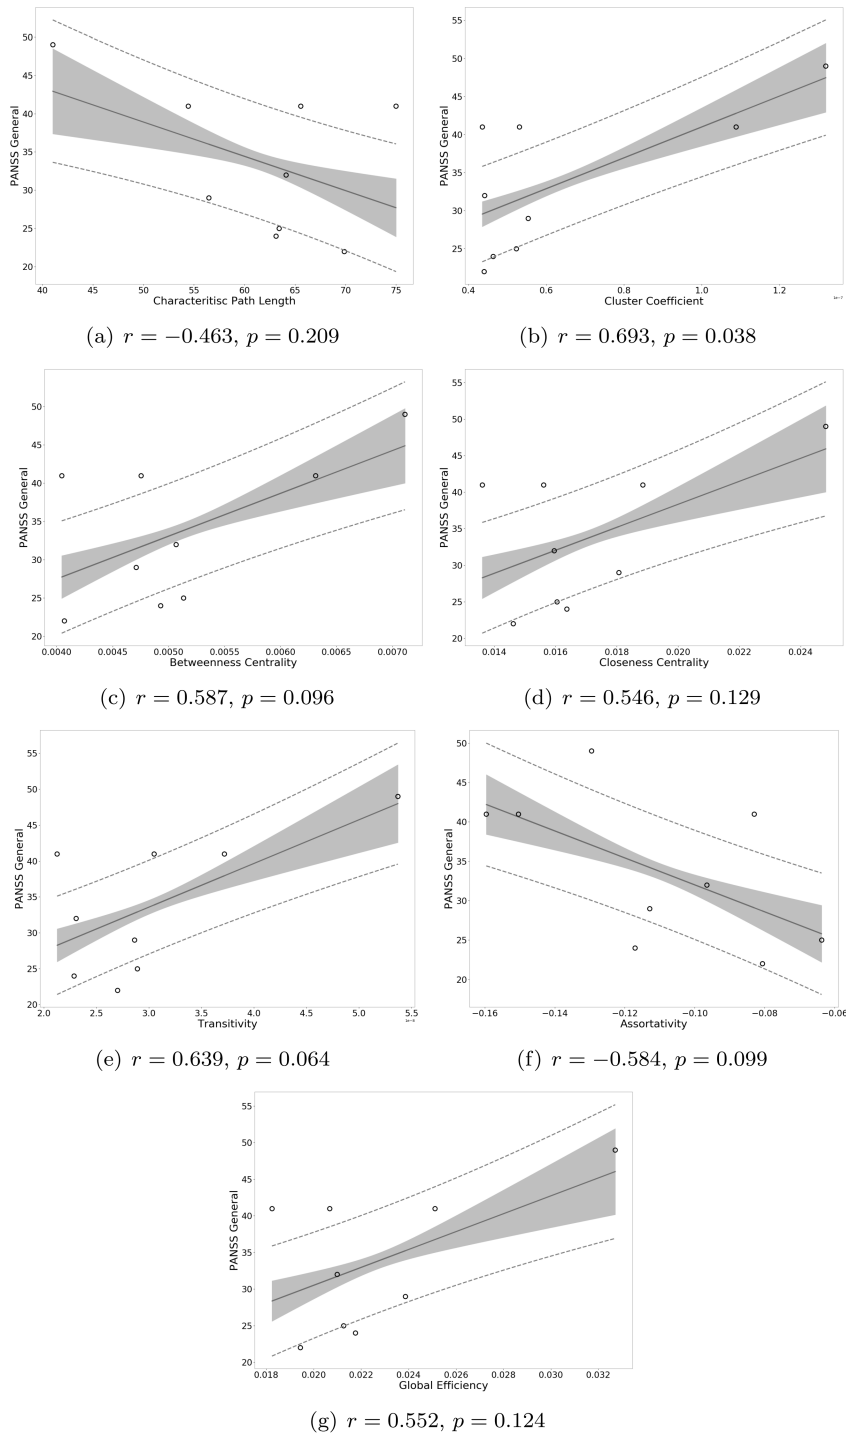

Figure S8: Correlation of graph measures of the SCZaff group with PANSS general scores. a) characteristic path length, b) cluster coefficient, c) betweenness centrality, d) closeness centrality, e) transitivity, f) assortativity, and g) global efficiency. The line corresponds to the fitted trend line and the shaded region the 95% confidence interval.

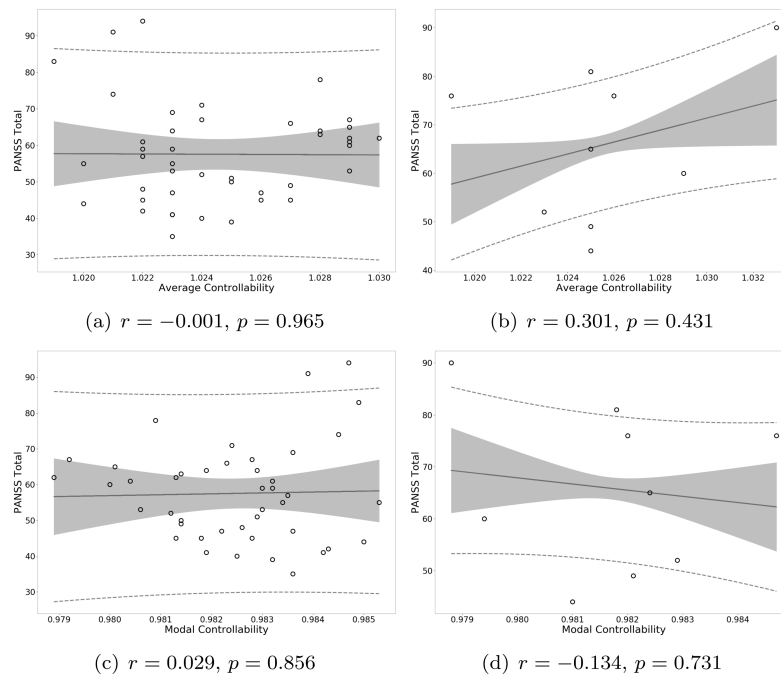

Figure S9: Correlation of controllability measures with PANSS total scores. a) average controllability (SCZ), b) average controllability (SCZaff), c) modal controllability (SCZ), and d) modal controllability (SCZaff). The line corresponds to the fitted trend line and the shaded region the 95% confidence interval.

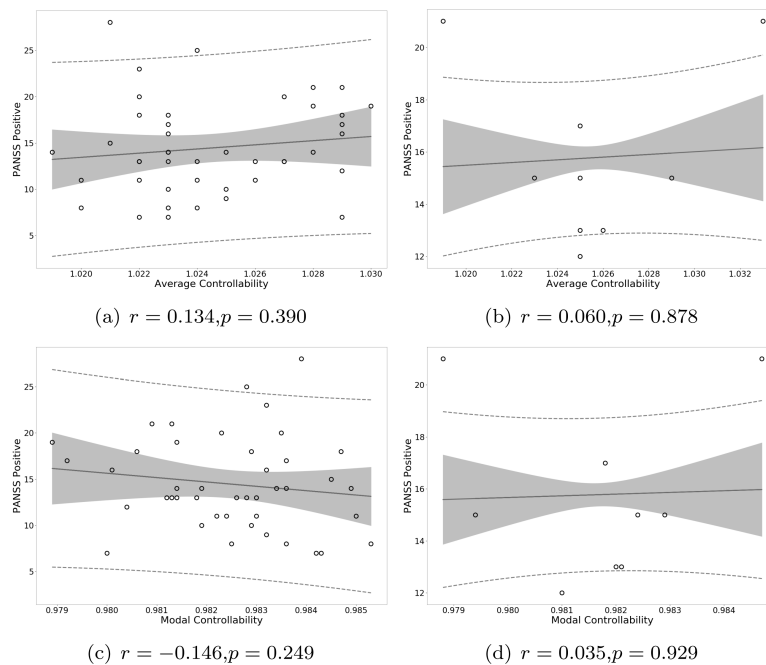

Figure S10: Correlation of controllability measures with PANSS positive scores. a) average controllability (SCZ), b) average controllability (SCZaff), c) modal controllability (SCZ), and d) modal controllability (SCZaff). The line corresponds to the fitted trend line and the shaded region the 95% confidence interval.

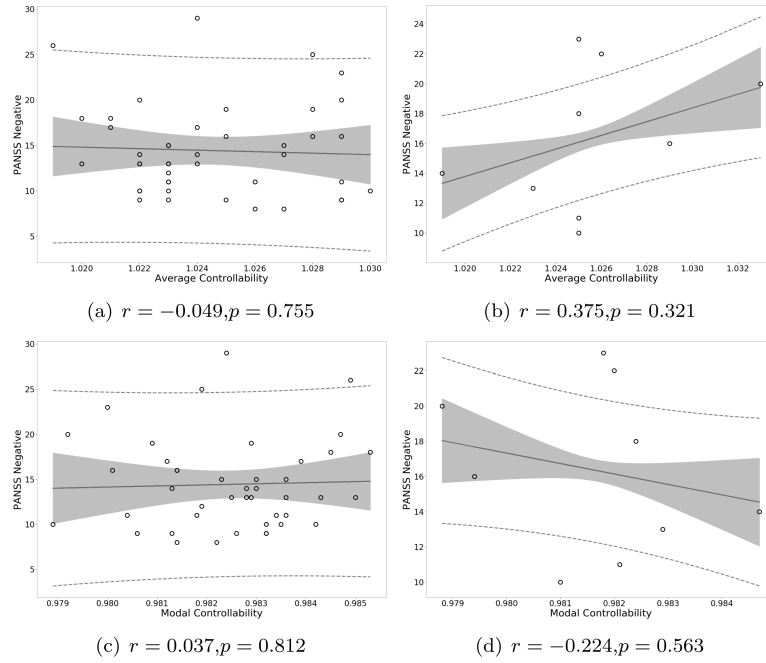

Figure S11: Correlation of controllability measures with PANSS negative scores. a) average controllability (SCZ), b) average controllability (SCZaff), c) modal controllability (SCZ), and d) modal controllability (SCZaff). The line corresponds to the fitted trend line and the shaded region the 95% confidence interval.

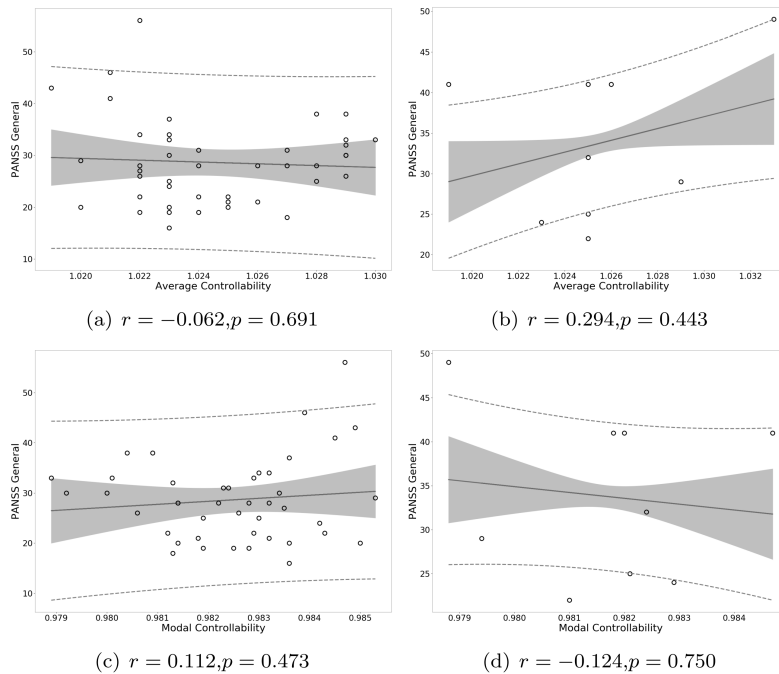

Figure S12: Correlation of controllability measures with PANSS general scores. a) average controllability (SCZ), b) average controllability (SCZaff), c) modal controllability (SCZ), and d) modal controllability (SCZaff). The line corresponds to the fitted trend line and the shaded region the 95% confidence interval.

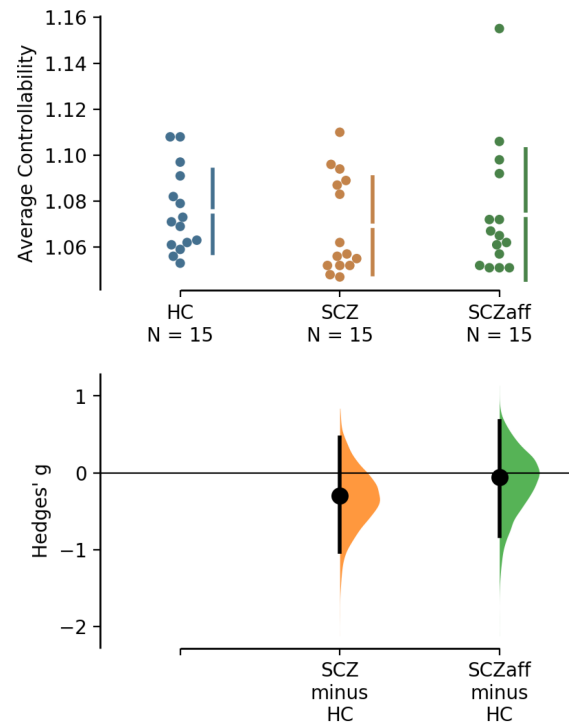

(a) Average controllability

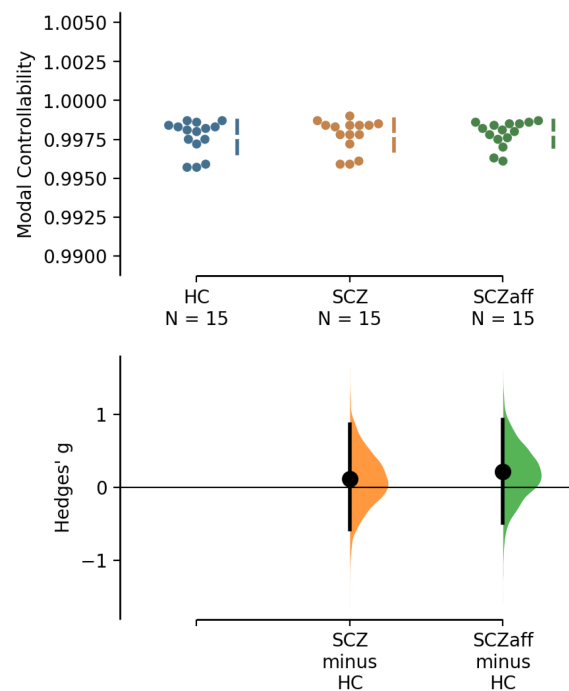

(b) Modal controllability

Figure S13: Cognitive systems and controllability. Hedge's  $g$  for the comparisons of (a) average and (b) modal controllability of weighted graphs of the SCZ and SCZaff groups against the HC group are shown in the above Cumming estimation plot. Here, we restricted the analysis to the top 15 regions with highest average and modal controllability (averaged over all subjects), respectively. See also Figure 4 in the main manuscript. The raw data is plotted on the upper axes. On the lower axes, Hedge's  $g$  is plotted as bootstrap sampling distributions. Each  $g$  is depicted as a dot. Each 95% confidence interval is indicated by the ends of the vertical error bars.

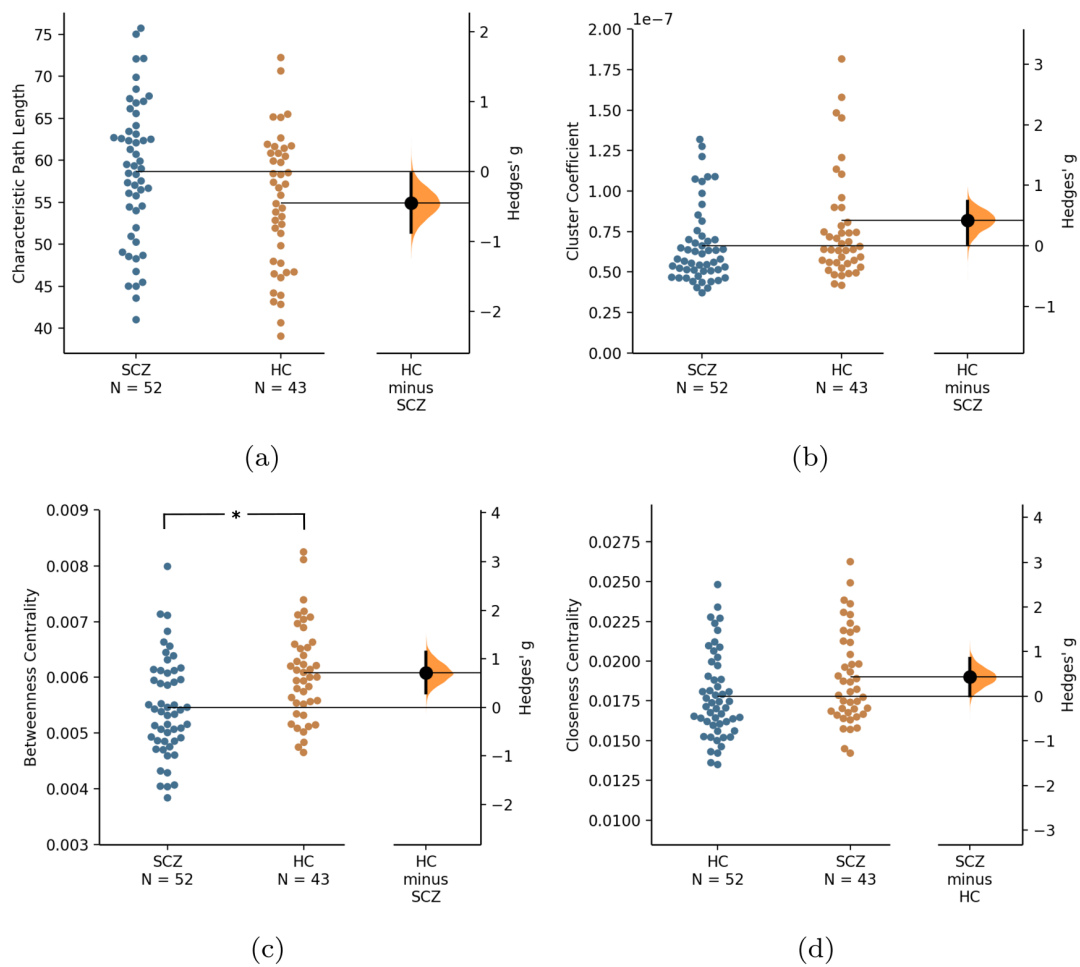

Figure S14: Hedge's  $g$  for the comparisons of various graph measures for the pooled SCZ and SCZaff groups (denoted by SCZ) against the HC group are shown in the above Cumming estimation plot. The raw data is plotted on the upper axes. On the lower axes, mean differences are plotted as bootstrap sampling distributions. Each mean difference is depicted as a dot. Each 95% confidence interval is indicated by the ends of the vertical error bars. Specifically, panels show a) characteristic path length (measure of integration) b) cluster coefficient (measure of segregation), c) betweenness centrality (measure of centrality) and d) closeness centrality (measure of centrality). \* denotes statistically significant differences at a significance level of 0.05 Bonferroni corrected.



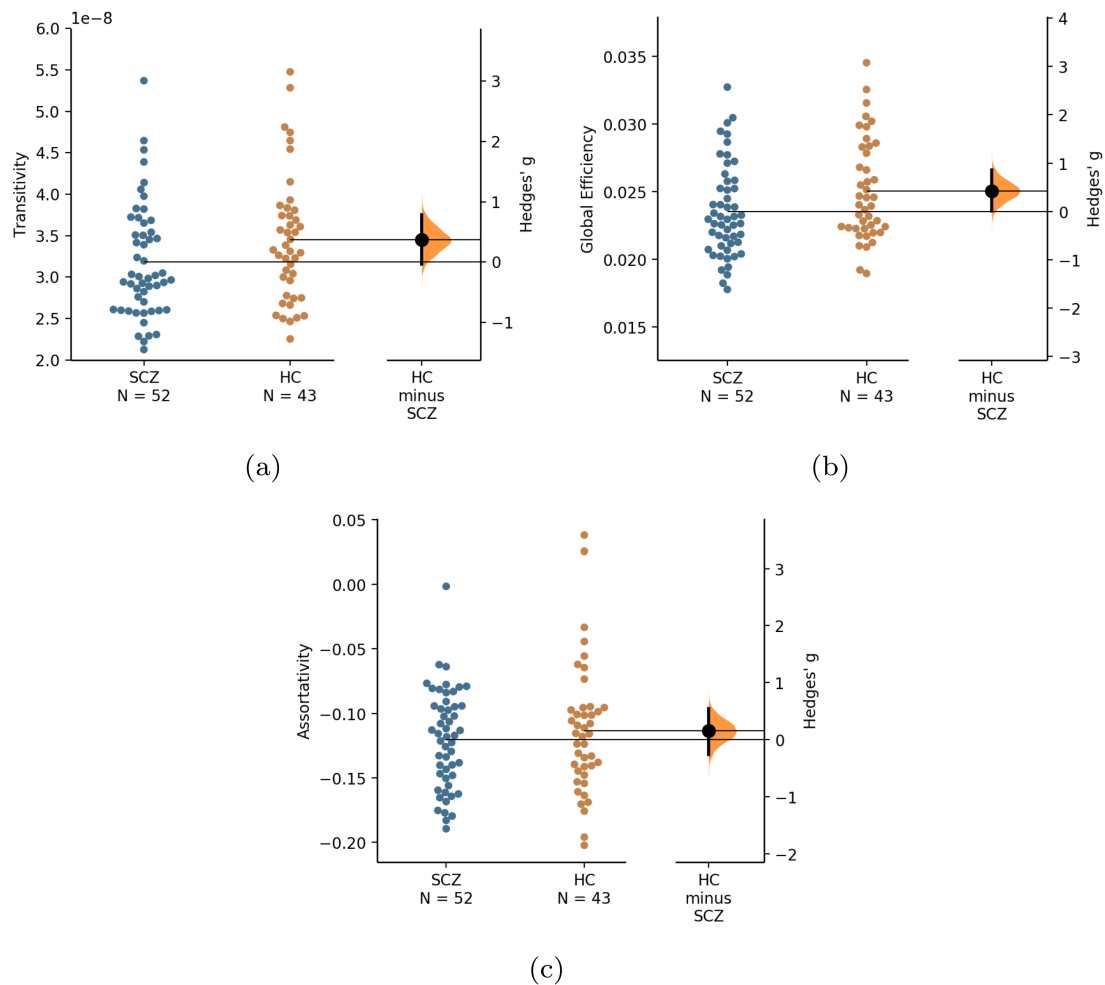

Figure S15: Hedge's  $g$  for the comparisons of various graph measures for the pooled SCZ and SCZaff groups (denoted by SCZ) against the HC group are shown in the above Cumming estimation plot. The raw data is plotted on the upper axes. On the lower axes, mean differences are plotted as bootstrap sampling distributions. Each mean difference is depicted as a dot. Each 95% confidence interval is indicated by the ends of the vertical error bars. Specifically, panels show a) transitivity (measure of segregation) b) global efficiency (measure of integration), and c) assortativity (measure of resilience). \* denotes statistically significant differences at a significance level of 0.05 Bonferroni corrected.

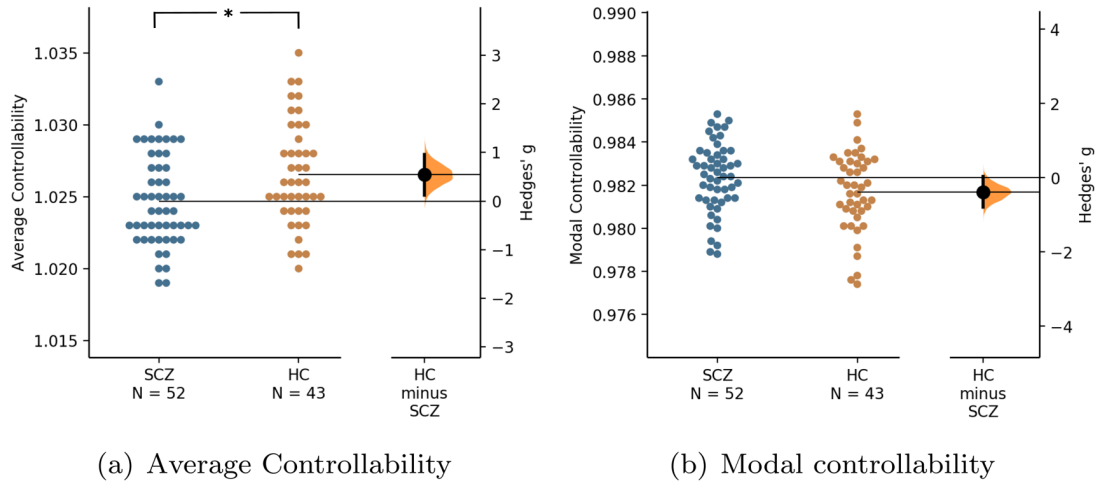

Figure S16: Hedge's  $g$  for the comparisons of (a) average and (b) modal controllability of unweighted graphs of the pooled SCZ and SCZaff group (denoted by SCZ) against the HC group are shown in the above Cumming estimation plot. The raw data is plotted on the upper axes. On the lower axes, Hedge's  $g$  is plotted as bootstrap sampling distributions. Each  $g$  is depicted as a dot. Each 95% confidence interval is indicated by the ends of the vertical error bars.
